# Supplementary material for: Using analog computers in today's largest computational challenges
Source: Copernicus journal article supplement (doi:10.5194/ars-19-105-2021), 2021-12-17
Supplement: Supplementary file [file ars-19-105-2021-supplement-title-page.pdf › ars-19-105-2021-supplement-title-page.pdf]

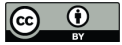

## *Supplement of*

# **Using analog computers in today's largest computational challenges**

**Sven Köppel et al.**

*Correspondence to:* Sven Köppel ([koeppel@anabrid.com](mailto:koeppel@anabrid.com))

- `ars-19-105-2021-supplement-title-page.pdf`
- `Howto_measure_flops.md`
- `a.out`
- `dda.h`
- `ddy_eq_y.c`
- `notch_skaliert_aufgeraeumt.dda`
- `notch_skaliert_aufgeraeumt_dda.c`
- `run-test.sh`

The copyright of individual parts of the supplement might differ from the article licence.
